# 1 Frog nuptial pads secrete mating season-specific proteins 2 related to salamander pheromones

3

4 Bert Willaert<sup>1#</sup>, Franky Bossuyt<sup>1#</sup>, Sunita Janssenswillen<sup>1#</sup>, Dominique Adriaens<sup>2</sup>,  
5 Geert Baggerman<sup>3,4,5</sup>, Severine Matthijs<sup>1</sup>, Elin Pauwels<sup>6</sup>, Paul Proost<sup>7</sup>, Arent  
6 Raepsaet<sup>1</sup>, Liliane Schoofs<sup>3</sup>, Gwij Stegen<sup>1</sup>, Dag Treer<sup>1</sup>, Luc Van Hoorebeke<sup>6</sup>, Wim  
7 Vandebergh<sup>1</sup>, Ines Van Bocxlaer<sup>1\*</sup>

8

9

10 <sup>#</sup> these authors contributed equally

11 <sup>\*</sup> Author for correspondence (ivbocxla@vub.ac.be)

12

13 <sup>1</sup> Vrije Universiteit Brussel, Biology Department, Amphibian Evolution Lab, Pleinlaan 2, B-  
14 1050 Brussels, Belgium.

15 <sup>2</sup> Ghent University, Evolutionary Morphology of Vertebrates, K.L. Ledeganckstraat 35, B-  
16 9000 Gent, Belgium.

17 <sup>3</sup> Functional Genomics and Proteomics, Department of Biology, KU Leuven, Naamsestraat  
18 59, B-3000 Leuven, Belgium

19 <sup>4</sup> VITO, Boeretang 200, 2400 MOL, Belgium

20 <sup>5</sup> CFP/Ceproma, University Antwerp, Groenenborgerlaan 171, 2020 Antwerpen, Belgium

21 <sup>6</sup> Centre for X-ray Tomography (UGCT), Department of Physics and Astronomy, Ghent  
22 University, Proeftuinstraat 86, 9000 Ghent, Belgium

23 <sup>7</sup> Laboratory of Molecular Immunology, Rega Institute for Medical Research, University of  
24 Leuven, Minderbroedersstraat 10, 3000 Leuven, Belgium.

25

26

## 27 **Key words (6)**

28 Anura, nuptial pad, chemical communication, amplexin, Ly-6/uPAR protein family, Three-  
29 finger motif

30

31 Short title: Frog nuptial pad proteins

## Summary

Males of many frog species develop spiny nuptial pads with underlying glands on their thumbs during the mating period. We used 3D visualisation on the European common frog *Rana temporaria* to show that these glands' morphology allows the channeling of secreted molecules to the pad's surface during amplexus. Combined transcriptome and proteome analyses show that proteins of the Ly-6/uPAR family, here termed amplexins, are highly expressed in the nuptial glands during the mating season, but are totally absent outside that period. The function of amplexins remains unknown, but it is interesting to note that they share structural similarities with Plethodontid Modulating Factors, proteins that influence courtship duration in salamanders.

## 1. INTRODUCTION

As with many animal taxa, amphibians are expected to make extensive use of chemical communication during courtship and reproduction. In salamanders (Urodela), several courtship pheromones have already been characterized, and most of them turned out to be proteins or peptides (Houck, 2009). Frogs and toads (Anura) make extensive use of acoustic signals during the mating period, and it has therefore long been assumed that chemical communication was more limited in this group. During the past two decades, however, increasing evidence from behavioural experiments has shown chemical communication to be more widespread among anuran taxa than previously assumed (Houck, 2009), but the molecules influencing anuran behaviour remain largely uncharacterized.

During the mating season, males of most species of frogs and toads can often be observed taking a piggyback ride on the female (Figure 1A). This so-called amplexus is necessary for coordinating egg deposition and sperm release during the typical anuran process of external fertilization (Duellman and Trueb, 1986). During the annual mating season, male frogs develop keratinized, often spiny nuptial pads on their thumbs and forearms. It is generally acknowledged that these pads serve to improve the male's grip on the female during amplexus (Duellman and Trueb, 1986). Histological studies additionally have shown the presence of glands below the surface of the nuptial pads (Thomas et al., 1993). Because these glands release their secretion

only onto the keratinized surface of nuptial pads (Kyriakopoulou-sklavounou et al., 2012), it has been proposed that they produce glue-like substances to enhance the male's grip on the female (Brizzi et al., 2003). However, nuptial and other sexually dimorphic skin glands (SDSGs) differ histochemically from other anuran skin glands and share features with known pheromone glands in salamanders, being both multicellular, alveolar glands with a granular secretion product (Thomas et al., 1993). This indicates that nuptial pads may also synthesize chemical signals involved in courtship and mating. Moreover, pheromones produced in the mental glands of some plethodontid salamanders are delivered transdermally (Houck and Reagan, 1990). This is particularly interesting, because inspection of *Rana* females directly after egg laying shows that the ventral skin is often abraded at the site where the male's spiny nuptial pads have been holding the female (Figure 1B), leaving the possibility of a similar way of delivering chemical signals in anurans.

We used micro-CT scan imaging of the nuptial pad of the European common frog *Rana temporaria* Linneaus (1758), to show that the nuptial gland morphology allows the channelling of secreted molecules to the pad's surface. We subsequently screened the transcriptome of the nuptial glands for candidate pheromones or other proteins with a possible signalling function by construction of a cDNA library and we compared the proteome of the nuptial pad in the breeding and non-breeding seasons.

## 2. MATERIAL AND METHODS

### *Micro-CT scanning*

Collection of animals was done with permit ANB/BL-FF/V11-00033. Sampling complied with EU and Belgian regulations concerning animal welfare. The thumb of a male specimen of *Rana temporaria* (Haacht, Belgium; 29/03/11; sampled on day of capture) was fixed in 4% formalin. To visualize soft tissue organization using X-ray tomography, a postfixation in a 1% solution of osmium-tetroxide was performed for five hours (a common postfixation for electron microscopy) (Labor Impex, Brussels, Belgium). The thumb was subsequently scanned at the UGCT scanning facility at Ghent University using a transmission-type micro-focus X-ray tube (FeinFocus FXE160.51). The tube voltage was set to 80 kV and tube current was set to 112  $\mu$ A, providing sufficiently small spot size. Specimens were mounted on a controllable rotating table (MICOS, UPR160F-AIR). Covering 360°, a series of 1440 projections of 2008x1778 pixels was recorded using a PerkinElmer XRD 1620 CN3 CS flat-panel

100 detector. A geometric magnification of 54 was achieved, resulting in an isotropic  
101 reconstructed voxel size of 3.7  $\mu\text{m}$ . Reconstruction of the tomographic projection data  
102 was done using the in-house developed Octopus-package. The 3D volume rendering  
103 of the reconstructed sections was done using Amira 5.4.0 (Visage Imaging Inc.,  
104 Berlin, Germany), where individual glands were manually segmented.

105

## 106 ***Histology***

107

108 The thumbs of two male specimens (Haacht, Belgium; captured on 29/03/11 and  
109 sampled on the same day) were removed and fixed in 4% formalin. The thumb pads  
110 with surrounding skin was surgically removed and embedded in paraffin (Histosec,  
111 56-58°C, Merck Belgium). Sections of 5 and 7  $\mu\text{m}$  were cut using a Prosan Microm  
112 HM360 microtome equipped with disposable metal knives. Alternating sections were  
113 stained with an improved trichrome staining (for general histological details of the  
114 tissues) (Mangakis et al., 1964) or with a Periodic Acid Schiff reagents (to stain the  
115 mucus of the integumental glands) (Carson and Hladik, 2009). Sections were  
116 subsequently mounted on glass slides using DPX (VWR International, Belgium) and  
117 imaged using a Zeiss Polyvar microscope equipped with a Colorview8 digital camera.

118

## 119 ***cDNA Library***

120 A cDNA library was constructed from the two nuptial pads of a single individual  
121 (Haacht, Belgium; 29/03/11; sampled on day of capture) during the mating season.  
122 RNA was extracted with TRI reagent, using manufacturer instructions (Sigma-  
123 Aldrich, Bornem, Belgium). A 0.05  $\mu\text{g}$  of total RNA was reverse transcribed and  
124 cloned into a vector using the Creator SMART cDNA library construction kit  
125 (Clontech, Leusden, The Netherlands). Transformation was performed with One  
126 Shot® TOP10 Electrocomp™ *E. coli* electrocompetent cells (Invitrogen, Ghent,  
127 Belgium) and colonies were grown on LB agar plates containing chloramphenicol  
128 (30 $\mu\text{g}/\text{ml}$  final concentration). Colonies were picked randomly and amplified using  
129 vector specific primers (M13). The following PCR conditions were used: one initial  
130 denaturation for 240s at 94°C, followed by 25 cycles with denaturation for 40s at  
131 94°C annealing for 60s at 55°C, and elongation for 60s at 72°C. Amplification  
132 products were purified with a PCR-purification kit (Qiagen, Hilden, Germany) and  
133 571 clones were sequenced on an ABI Prism 3100 Genetic Analyzer (Applied

134 Biosystems, Halle, Belgium). CodonCode Aligner 3.7.1.1 (CodonCode Corporation,  
 135 Centreville, Massachusetts, USA) was used for base calling, vector and quality  
 136 clipping and assemblage of contiguous sequences (contigs). The mRNA sequences  
 137 were translated into their corresponding AA-sequence using the Expasy translating  
 138 tool (<http://web.expasy.org/translate/>) and molecular mass was calculated using the  
 139 software Sequence Editor (Bruker, Brussels, Belgium). BLAST (Basic Local  
 140 Alignment Search Tool) was used to compare the nucleotide sequences to the  
 141 nucleotide database of the National Center for Biotechnology Information (blastn) and  
 142 the translated nucleotide sequences (all reading frames) were compared to the protein  
 143 database (blastx).

144

#### 145 ***RACE PCR***

146 We performed 3'-RACE (rapid amplification of cDNA ends) PCR to obtain full-length  
 147 sequences of mRNA molecules of interest using the SMARTer-RACE cDNA  
 148 amplification kit (Clontech, Leusden, The Netherlands). Molecules of interest were  
 149 selected based on transcript abundance in the cDNA library, presence of a signal  
 150 peptide and similarities with known vertebrate pheromones. The cDNA was reverse-  
 151 transcribed from 1 µg total RNA extracted from the nuptial pad of one individual male  
 152 (Haacht, Belgium; 29/03/11; sampled on day of capture and stored in RNA-later). One  
 153 gene specific primer designed on the signal peptide region of the molecule of interest  
 154 (GCAGAACATCANRATGAAAGC) was used to amplify the 3' side of the mRNA  
 155 transcript. The following PCR conditions were used: one initial denaturation for 240s  
 156 at 94°C, followed by 36 cycles with denaturation for 40s at 94°C, annealing for 60s at  
 157 60°C, and elongation for 60s at 72°C. Amplification products were cloned using a  
 158 pGEM-T Easy cloning vector (Promega, Leiden, The Netherlands) and vectors were  
 159 transformed into DH5α™ Competent Cells (Invitrogen, Ghent, Belgium). Seventy-  
 160 two colonies were picked randomly and inserts were amplified using the same PCR  
 161 conditions as described above. Amplification products were purified using the Wizard  
 162 SV 96 PCR Clean-Up System (Promega, Leiden, The Netherlands). Purified products  
 163 were cycle-sequenced using the BigDye Terminator v3.1 Cycle Sequencing kit and  
 164 visualized on an ABI Prism 3100 Genetic Analyzer (Applied Biosystems, Halle,  
 165 Belgium). Sequence editing and contig assembly was performed with CodonCode  
 166 Aligner 3.7.1.1 (CodonCode Corporation, Centreville, Massachusetts, USA). Using  
 167 the MAFFT online server (<http://mafft.cbrc.jp/alignment/software/>), sequences of

168 interest were aligned with Plethodontid Modulating Factor (PMF) sequences  
169 (*Plethodon shermani*, AEO22663.1 and *Aneides ferreus*, ABI48851.1), a salamander  
170 courtship pheromone of the Ly-6/uPAR protein family (Palmer et al., 2007).

171

## 172 **HPLC**

173 To compare protein content in breeding and non-breeding seasons, we surgically  
174 removed nuptial pads from males several times during the year (breeding: 15/03/11,  
175 Haacht, Belgium; non breeding: 18/06/10, Haacht, Belgium, 3/11/10, Brugge,  
176 Belgium and 2/08/11, Haacht, Belgium; all samples were taken on the same day of  
177 frog collection) and placed them in 1 ml Amphibian Ringer Solution (ARS) – 0.8 mM  
178 Acetylcholine chloride (AcChCl) for 30 min (4°C). Each sample was subsequently  
179 centrifuged (4°C – 15 min - 14000 rpm) and the supernatant was filtered through an  
180 Ultrafree-MC 0.22 µm spin down filter (Millipore, Overijse, Belgium). Samples were  
181 dried using a Univapo 150 ECH vacuum concentrator connected to a FTS VT490  
182 Cold Trap and Edwards RV3 vacuum pump. They were then resolved in 2%  
183 acetonitrile (CH<sub>3</sub>CN) with 0.1% trifluoroacetic acid (TFA) and subsequently loaded  
184 on a Beckman System Gold High Performance Liquid Chromatographer equipped  
185 with a diode array detector 168 and programmable solvent module 126. We used a  
186 Waters Symmetry C8 column (5 µm; 4.6 x 250 mm). After an initial five minutes of  
187 washing with 98% solvent A (0.1% TFA) and 2% of solvent B (80% CH<sub>3</sub>CN, 0.1%  
188 TFA), concentration of solvent B was linearly increased to 100% in 55 minutes. Flow  
189 rate was 1 ml/min and fractions were collected every minute using an automated  
190 Gilson fraction collector 202. Alternatively, some samples were loaded on a Source 5  
191 RPC column (4.6 x 150 mm) in 0.1% TFA and eluted with a linear CH<sub>3</sub>CN gradient  
192 (0% to 80%) in 0.1% TFA on a Waters 600 HPLC system. UV absorbance of the  
193 eluted proteins was detected at 214 nm and part (1/150) of the effluent was split on-  
194 line to an ion trap mass spectrometer. Fractions were stored at – 20°C.

195

## 196 **Mass analyses**

197 Mass analyses of the HPLC fractions were performed by electrospray ionization ion  
198 trap mass spectrometry on an ESQUIRE-LC MS (Bruker, Brussels, Belgium). In  
199 addition, stored fractions were analysed on an Ultraflex II MALDI TOF/TOF mass  
200 spectrometer (Bruker, Brussels, Belgium). Each fraction was lyophilized and  
201 resuspended in 100 µl milliQ H<sub>2</sub>O. One µl was mixed on the metal target with an

equal volume of matrix solution (50 mM  $\alpha$ -cyano 4-hydroxycinnamic acid in 30% acetonitrile containing 0.1% TFA). The solution was air-dried and introduced into the MALDI TOF/TOF mass spectrometer source. Intensity graphs of mass-to-charge (m/z) were presented through the software FlexAnalysis (Bruker, Brussels, Belgium). Fractions that contained a peak of interest were sequenced *de novo* by means of Edman degradation on a capillary 491 Procise cLC protein sequencer (Applied Biosystems, Halle, Belgium). Detected masses were compared with theoretical masses predicted from the translated cDNA sequences in Sequence Editor (Bruker, Brussels, Belgium).

### 3. RESULTS AND DISCUSSION

The nuptial pad of *Rana temporaria* covers the entire preaxial part of the thumb (Figure 1C) in male individuals and is completely absent in females. Micro-CT scans of the nuptial pad (Figure 1D) showed the presence of two types of acinar glands in the dermis (Figure 1E), similar to those found in other species (Brizzi et al., 2003; Thomas et al., 1993). They differ at the level of their overall size and thickness of the epithelial wall, but both have a duct exiting at the epidermal surface, in between the keratinous cones of the pads (Figure 1D & E; pores indicated with white arrows). Such morphology allows molecules synthesized and stored in the nuptial glands to be channelled to the pad's surface during amplexus. The larger glands are less numerous, and are lined by low columnar cells containing granules. Considering the large central lumen, these glands seem to have the capacity to temporarily store secretions. The small glands, on the other hand, are lined by high columnar cells, and are also intensively granular. In these glands, the central lumen is reduced and continues into branching crypts running in between the epithelial cells, so storing of secretions is probably limited. Both gland types showed similar stainings with PAS, so no further details about functionality could be derived at this point.

An SDS page of extracted glands confirms the presence of a wide array of proteins (supplementary figure 1). cDNA library construction and subsequent EST sequencing of the nuptial glands showed that the most abundant protein-coding mRNA sequences (3.3% of the transcriptome) during the breeding season encode three isoforms of a small (104 AA) secretory protein of the Ly-6/uPAR protein family, which we termed amplexin (Figure 2A, amplexin 1-3). RACE-PCR on the nuptial



236 pads identified transcripts encoding two additional isoforms of this protein (Figure  
 237 2A, amplexin 4 and 5) (GenBank Numbers KC282376-KC282380). Secretory Ly-  
 238 6/uPAR proteins are often involved in the modulation of nicotinic and muscarinic  
 239 acetylcholine receptors (nAChRs and mAChRs, respectively) to elicit neuronal or  
 240 muscular physiological responses (Adermann et al., 1999). For example, mammalian  
 241 PATE proteins comprise a considerable group of secretory Ly-6/uPAR proteins that  
 242 are mainly found in male reproductive organs. Some of these proteins have been  
 243 shown to interact with nAChRs, which suggests an involvement in the modulation of  
 244 neural transmission during reproduction and fertility (Levitin et al., 2008). Human  
 245 SP10 and SAMP14, for example, are involved in the regulation of the sperm-egg  
 246 interaction (Kong and Park, 2012), and plethodontid PMF is known to act as a  
 247 courtship pheromone (Palmer et al., 2007). Interestingly, BLAST searches with the  
 248 amplexins identified PMF as one of the closest related proteins. Alignment of the  
 249 amplexin isoforms with PMF clearly shows the similarities in protein domains (Figure  
 250 2A), and indicates the possible existence of an ancient pheromone system in  
 251 amphibians.

252 HPLC profiles and MS analyses revealed a high prevalence of amplexins during  
 253 the breeding season (Figure 2B, HPLC fractions 24-26). *De novo* sequencing of one  
 254 of these fractions yielded an N-terminal sequence of LQXYKGSXTGRPTXSLPVEI,  
 255 which confirms the match with the transcriptome data. Cysteines were not detected  
 256 (indicated as X in the sequence) as they were not alkylated prior to the sequence  
 257 analysis. Since Edman degradation of the complete fraction resulted in a single  
 258 sequence, all protein peaks within the fraction are likely to share this N-terminal  
 259 sequence. In combination with the detection of proteins that have a related but  
 260 different mass (by mass spectrometry), this confirms the presence of several isoforms  
 261 with an identical N-terminus as detected during transcriptome analyses. Importantly,  
 262 no amplexins were found in the corresponding HPLC fractions from all samples  
 263 collected in different months outside the breeding season (Figure 2B), and the  
 264 complete absence of these molecules was confirmed by mass spectrometry. The  
 265 nuptial pad gradually regresses in the weeks after breeding, but amplexin content was  
 266 observed to be more abrupt, with a much lower relative abundance at the end of the  
 267 breeding season, when the nuptial pad is still clearly present. This suggests that  
 268 changes in amplexin expression are not merely contributing to the yearly process of  
 269 nuptial pad recrudescence or regression.



Our combined observations and analyses indicate that amplexins are secreted at the male nuptial pad's spiny surface, probably during amplexus. Given that the spines also cause wounds on the female's chest, we hypothesize that the secreted molecules can seep directly in the female's circulatory system. Most vertebrates use olfactory and vomeronasal signal transduction in chemical communication (Brennan and Zufall, 2006), and such a direct delivery of protein pheromones into the circulatory system is only known from some species of plethodontid salamanders (Houck and Reagan, 1990). Males of several plethodontid species develop hypertrophied premaxillary teeth and a sexually dimorphic mental gland during the breeding season, which they use to rub their pheromones into the female skin (Houck and Reagan, 1990). Since nuptial pads and male-specific breeding glands are common in multiple amphibian families (Duellman and Trueb, 1986), it is possible that pheromone delivery through skin abrasion will prove to be a common theme in amphibian reproduction. A function for amplexins is as yet unknown. However, because mating frogs are far less mobile and more vulnerable to predation than single frogs, an accelerated mating process would have an obvious selective advantage. Although speculative, we hypothesize that nuptial pads may secrete pheromones that reduce the duration of amplexus, a function that would be similar to that of combined protein pheromones in plethodontid salamanders (Houck, 2009).

#### 4. ACKNOWLEDGMENTS

We are grateful to B. De Kegel for assistance, and to M. Fourier (Natuurpunt), D. Janssenswillen and P. Vermeylen for granting access to breeding pools. Research was permitted by Agentschap voor Natuur en Bos (permit ANB/BL-FF/V11-00033).

#### 5. FUNDING

Research was supported by a European Research Council starting grant ERC 204509 (project TAPAS), Fonds voor Wetenschappelijk Onderzoek (FWO) Vlaanderen (grant G.0133.08), and Ghent University BOF and GOA (grant 01G01008). SJ is supported by IWT-Vlaanderen (grant 093428), IVB received a postdoctoral fellowship from FWO-Vlaanderen (grant 59362).

- 6. REFERENCES**
- Adermann, K., Wattler, F., Wattler, S., Heine, G., Meyer, M., Forssmann, W.-G. and Nehls, M.** (1999). Structural and phylogenetic characterization of human SLURP-1, the first secreted mammalian member of the Ly-6/uPAR protein superfamily. *Protein science* **8**, 810–819.
- Brennan, P. A. and Zufall, F.** (2006). Pheromonal communication in vertebrates. *Nature* **444**, 308–315.
- Brizzi, R., Delfino, G. and Jantra, S.** (2003). An Overview of Breeding Glands. In *Reproductive Biology and Phylogeny of Anura* (ed. Jamieson, B. G. M.), pp. 253–317. Enfield: Science Publishers, Inc.
- Carson, F. L. and Hladik, C.** (2009). *Histotechnology: A self-instructional text*. Hong Kong: American Society for Clinical Pathology Press.
- Duellman, W. E. and Trueb, L.** (1986). *Biology of Amphibians*. Baltimore: The Johns Hopkins University Press.
- Houck, L. D.** (2009). Pheromone Communication in Amphibians and Reptiles. *The Annual Review of Physiology* **71**, 14.1–14.16.
- Houck, L. D. and Reagan, N. L.** (1990). Male courtship pheromones increase female receptivity in a plethodontid salamander. *Animal Behaviour* **39**, 729–734.
- Kong, H. K. and Park, J. H.** (2012). Characterization and function of human Ly-6/uPAR molecules. *BMB reports* **45**, 595–603.
- Kyriakopoulou-sklavounou, P., Papaevangelou, E. and Kladisios, N.** (2012). A scanning electron microscopic study of the surface morphology of nuptial pads in male amphibians ( Genus□: Bombina , Pelophylax , Rana ). *Acta Herpetologica* **7**, 81–90.
- Levitin, F., Weiss, M., Hahn, Y., Stern, O., Papke, R. L., Matusik, R., Nandana, S. R., Ziv, R., Pichinuk, E., Salame, S., et al.** (2008). PATE gene clusters code for multiple, secreted TFP/Ly-6/uPAR proteins that are expressed in reproductive and neuron-rich tissues and possess neuromodulatory activity. *The Journal of biological chemistry* **283**, 16928–16939.
- Mangakis, N., Böwe, E. and Pikova-Müllerova, Z. D.** (1964). Vorschlag für ein Erfahrungsgemäss guter und schnell arbeitends trichromverfahren. *Zentralblatt für Allgemeine Pathologie und Pathologische Anatomie* **105**, 289–292.
- Palmer, C. A., Hollis, D. M., Watts, R. A., Houck, L. D., McCall, M. A., Gregg, R. G., Feldhoff, P. W., Feldhoff, R. C. and Arnold, S. J.** (2007). Plethodontid modulating factor, a hypervariable salamander courtship pheromone in the three-finger protein superfamily. *The FEBS journal* **274**, 2300–2310.
- Thomas, E. O., Tsang, L. and Licht, P.** (1993). Comparative Histochemistry of the Sexually Dimorphic Skin Glands of Anuran Amphibians. *Copeia* **1993**, 133–143.

## FIGURE LEGENDS

343 Figure 1. (A) Couple of *Rana temporaria* in amplexus, showing the grip of the male.  
 344 (B) Wounds (black arrows) on the female chest after amplexus and egg-laying. (C)  
 345 Nuptial pad on the thumb of a male during the breeding season. (D) 3D visualisation  
 346 of the thumb of a male, showing the outlet of the glands between the spines (white  
 347 arrows) at the nuptial pad surface. (E) 3D reconstruction of a cross-section of the  
 348 nuptial pad, showing two gland types and their channels under the nuptial pad surface.  
 349

350 Figure 2. (A) Alignment of amplexin isoform sequences from the nuptial pad of a frog  
 351 with PMF-pheromones of two plethodontid salamanders. The conserved cysteins of  
 352 the Three-Finger Motif are in grey. Asterisks indicate identical amino acids. (B)  
 353 HPLC spectra of the nuptial pad secretion in breeding (upper spectrum) and non-  
 354 breeding (lower spectrum) season. The grey window shows the presence (respectively  
 355 absence) of amplexins in fractions 24 to 26. The grey line shows the linear increase of  
 356 solvent B.

357

## 358 SUPPLEMENTARY INFORMATION

359

360 Supplementary figure 1: (A) SDS page (15%) of the protein content of nuptial glands  
 361 of a male *Rana temporaria* during the breeding season (Haacht, Belgium; 09/02/10;  
 362 sampled on day of capture) and (B) PageRuler Plus Prestained Protein ladder  
 363 (Fermentas) in kilodaltons (kDa). Proteins were extracted using AcChCl and 20 µl of  
 364 the extracted product was mixed with 5 µl loading buffer and 1 µl DDT for  
 365 denaturation (5 minutes at room temperature, followed by 3 minutes at 90°C).

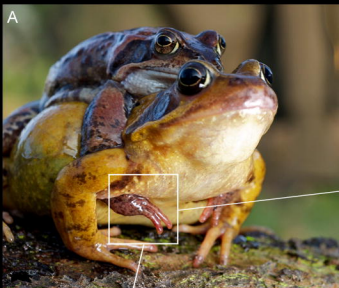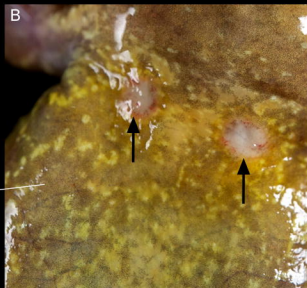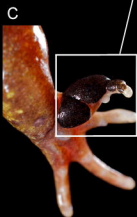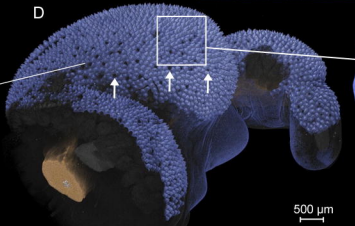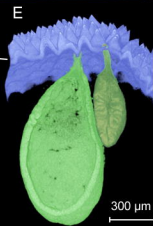

500  $\mu\text{m}$

300  $\mu\text{m}$

**A**

|               |                                                         |
|---------------|---------------------------------------------------------|
|               | 1.....10.....20.....30.....40.....50.....               |
|               | * * * *                                                 |
| amplexin 1    | MKAVISLLFLGLLFLHGEALQCYKGSCTGRPTCSLPVEICTGDQDQCVRRYGIR  |
| amplexin 2    | MKAVISLLFLGLLFLHGEALQCYKGSCTGRPTCSLPVEICTGDQDQCVRRTKIR  |
| amplexin 3    | MKAVISLLILGLLFLHGEALQCYKGSCTGGPSCSLPVEICTGDQDQCVRRTKIR  |
| amplexin 4    | -----LGLLFLHGEALQCYKGSCTGRPTCSLPVEICTGDQDQCVRRYGIR      |
| amplexin 5    | -----LGLLLHGEALQCYKGSCTGRPTCSLPVEICTGDQDQCVRRTKIR       |
| PMF Plethodon | MRSVLLIFLVVFVSTGNSLSCLYKNALED-----GIVTCPTERDNCI---IIK   |
| PMF Aneides   | MRATALLVLLVVLVSFGESLKCYESEGVK-----RIDECSNPDSCVH---VIS   |
|               | signal peptide Three-Finger motif                       |
|               | .....60.....70.....80.....90.....100.....               |
|               | * *                                                     |
| amplexin 1    | TPKGISANHRGDLTWTTQGCATKANCLELKTIKHYS----RCCSGDLCNSPKEM  |
| amplexin 2    | TNTGISANHRGDRAWTTTPGCATKANCLELKPMKHHS----RCCSGDLCNSPKEM |
| amplexin 3    | TNTGISANHRGDRAWTTTPGCATKANCLELKPMKHHS----RCCSGDLCNSPKEM |
| amplexin 4    | TPKGISANHHGDRAWTTQGCATKATCLELKPMKHHS----RCCSGDLCNAPKEM  |
| amplexin 5    | TNTGISANHHGDRAWTTQGCATKATCLELKPMKHHS----RCCSGDLCNAPKEM  |
| PMF Plethodon | TSTRD-----YKA--CASHEFCEKFPPELVNDPFEIHRCCQEDLCN-----     |
| PMF Aneides   | SKFGV-----WKT--CLLKLFQDDMAEMEKETFPIHVCCITDLCN-----      |
|               | Three-Finger motif                                      |

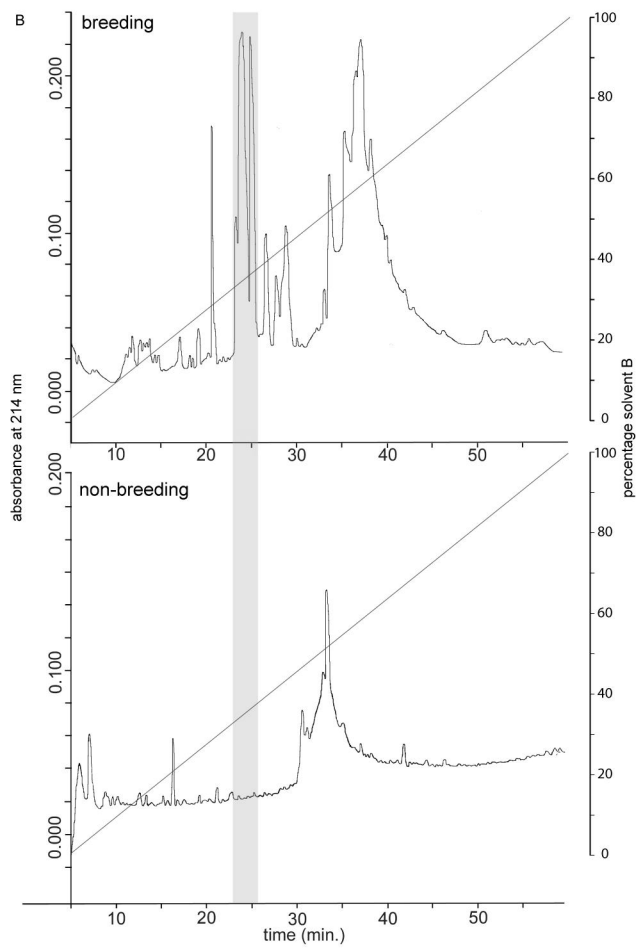

Source: https://cob.silverchair.com/jeb/article-pdf/doi/10.1242/jeb.086363/2037006/jeb_086363.pdf
